# Supplementary material for: Evaluation of microphysics and boundary layer schemes for simulating extreme rainfall events over Saudi Arabia using WRF-ARW
Source: Copernicus journal article supplement (doi:10.5194/nhess-26-21-2026), 2026-01-06
Supplement: Supplementary file 1 [file nhess-26-21-2026-supplement.pdf]

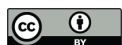

*Supplement of*

## **Evaluation of microphysics and boundary layer schemes for simulating extreme rainfall events over Saudi Arabia using WRF-ARW**

**Rajesh Kumar Sahu et al.**

*Correspondence to:* Hylke E. Beck ([hylke.beck@kaust.edu.sa](mailto:hylke.beck@kaust.edu.sa))

The copyright of individual parts of the supplement might differ from the article licence.

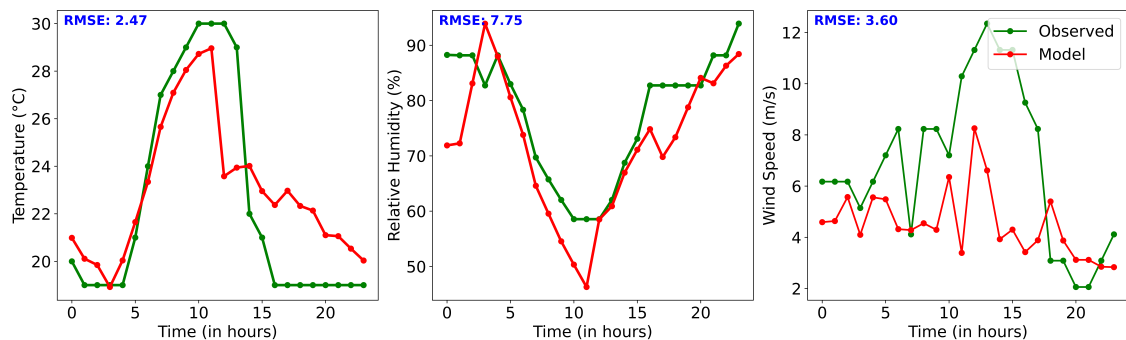

**Figure S1.** Surface meteorological parameters over Hafr Al Batin on 27th October 2019: temperature (°C), relative humidity (%), and wind speed (m/s), comparing WRF model simulations with IOWA station observations.

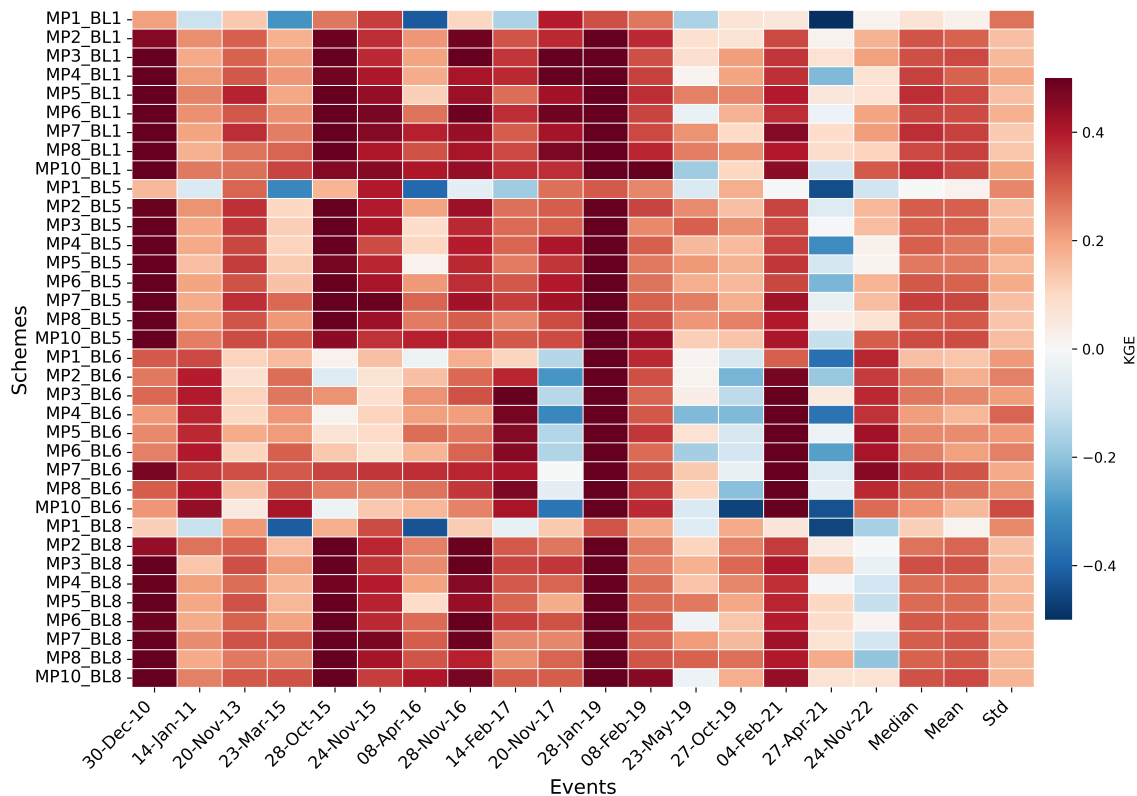

**Figure S2.** Spatial KGE scores for precipitation of 36 schemes combined for 17 EREs.

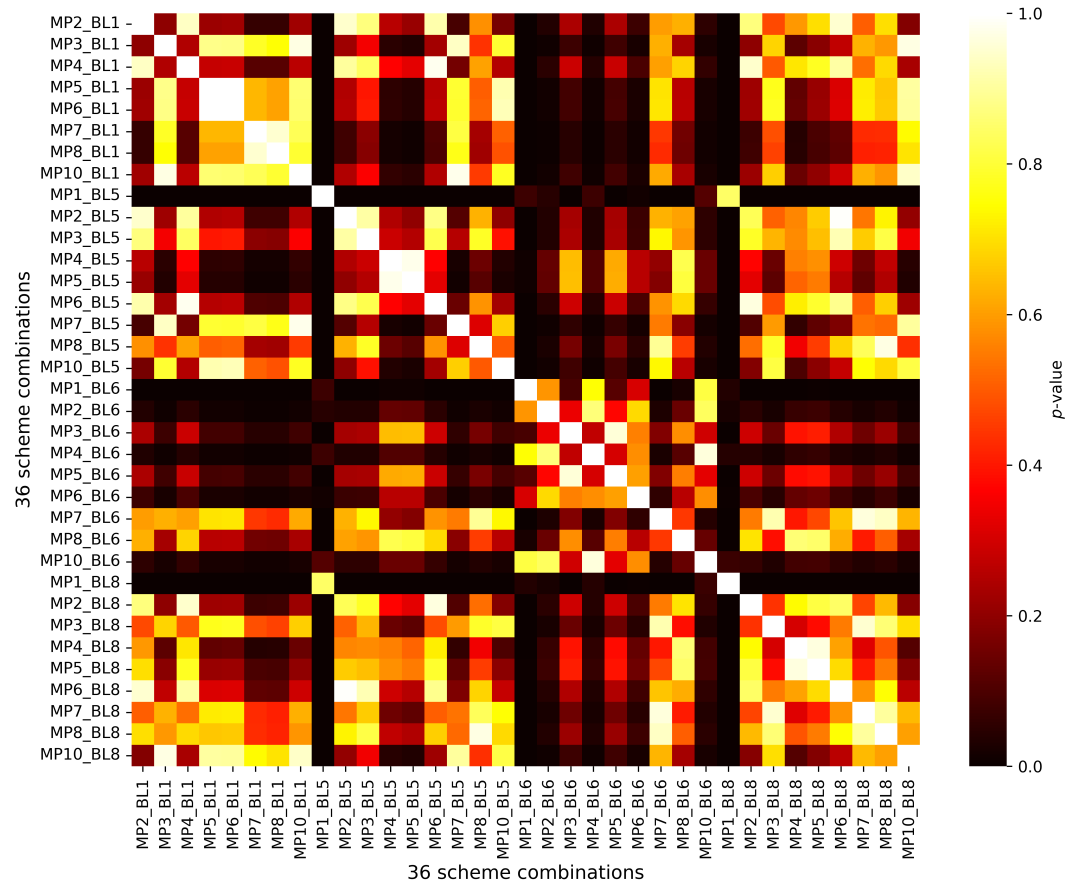

**Figure S3.** Pairwise p-values from independent t-tests comparing the  $\Delta$ KGE distributions of 36 scheme combinations for rainfall spatially.  $\Delta$ KGE values were calculated by subtracting the mean KGE across events from the KGE values. A p-value threshold of 0.1 was used to identify statistically significant differences between scheme combinations

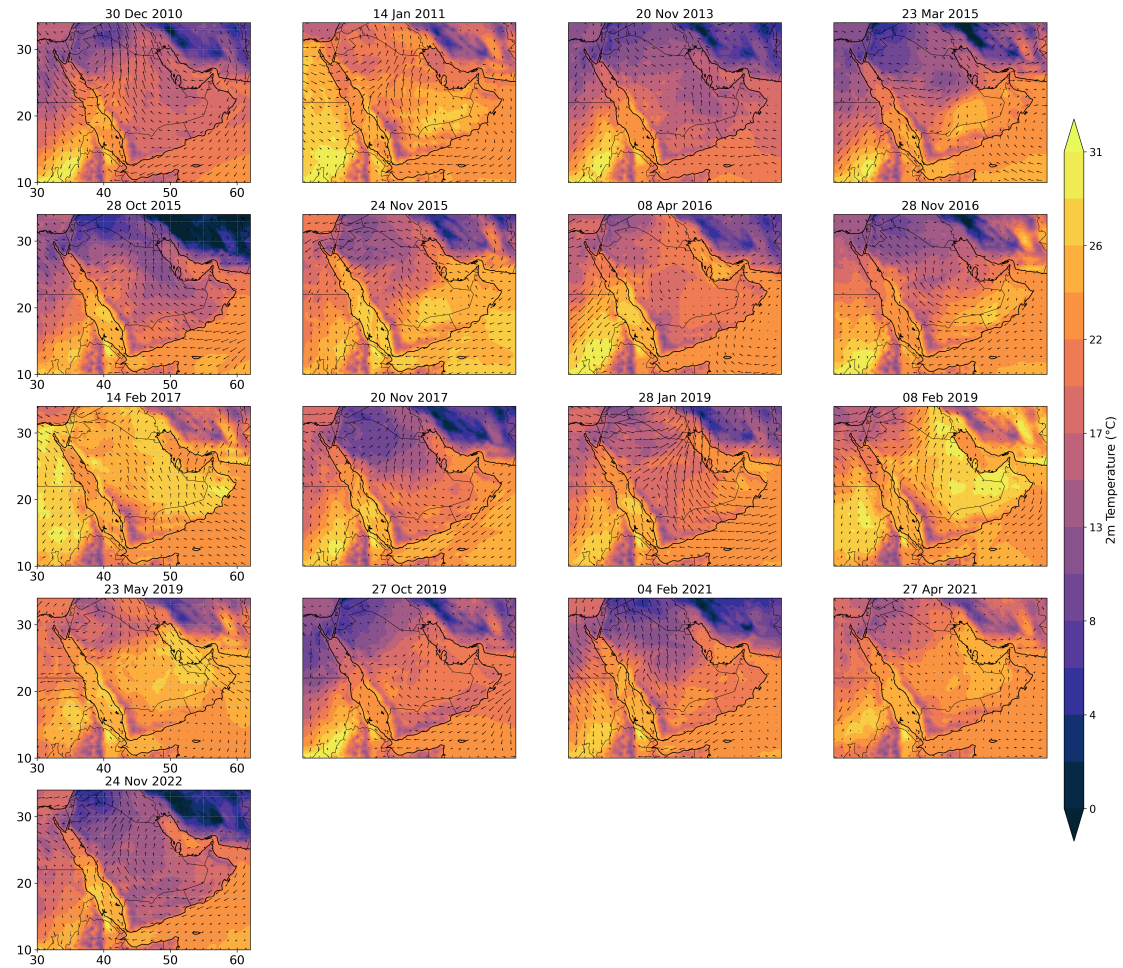

**Figure S4.** 850 hPa wind and near surface temperature from ERA5 reanalysis for 17 EREs.



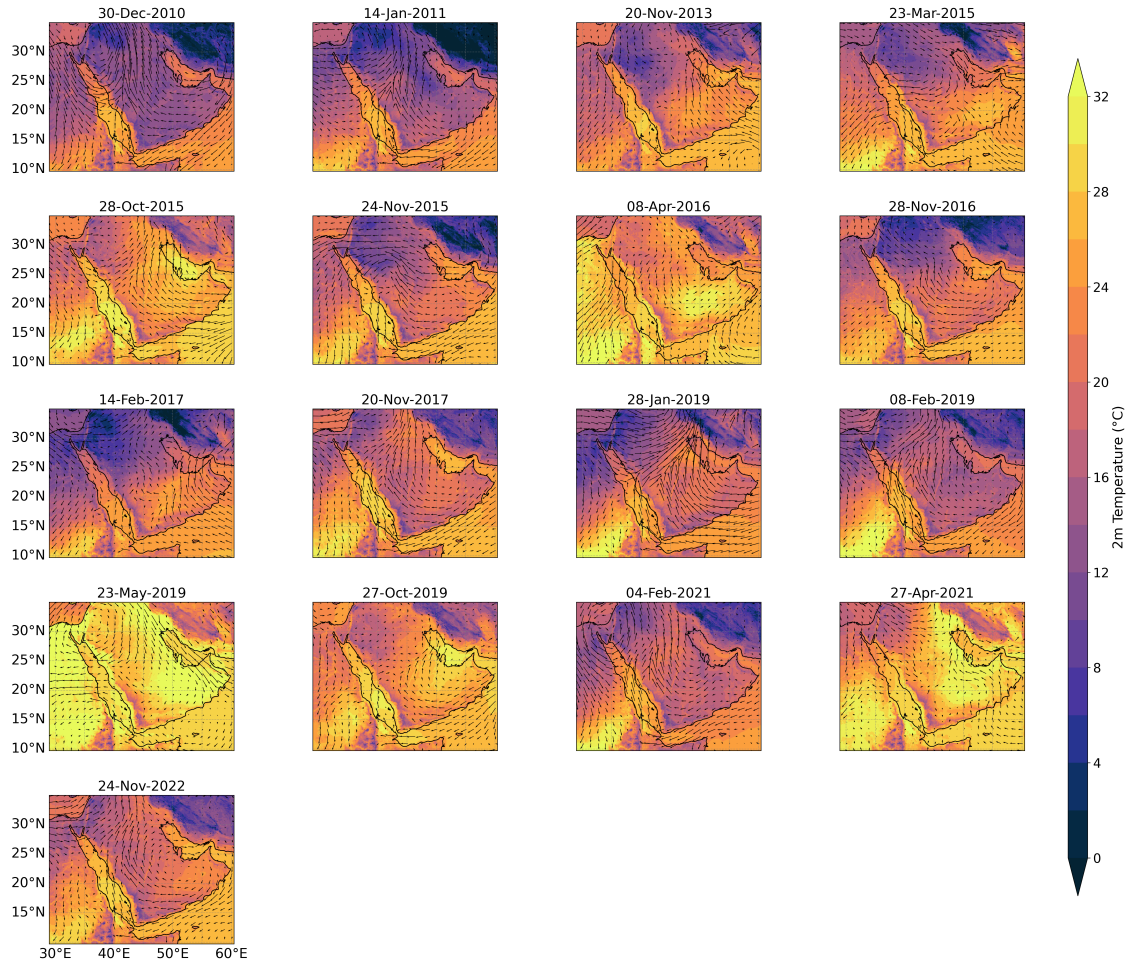

**Figure S5.** 850 hPa wind and near surface temperature from WRF model output for Thomson-YSU scheme combination for 17 EREs.
